# Supplementary material
Source: publisher figshare collection journal article supplement (https://rs.figshare.com/ndownloader/files/12574982)
Supplement: Supplementary file 1 [file 12574982]

**identification**

records identified through  
database searching:  
*Scopus*:  $n = 972$   
*Web of Science*:  $n = 2320$

additional records  
identified through  
other sources:  
 $n = 37$

records after duplicates removed:  $n = 2363$

**screening**

records  
screened:  
 $n = 2363$

records  
excluded:  
 $n = 2074$

**eligibility**

full-text articles  
assessed for  
eligibility:  
 $n = 289$

full-text articles  
excluded:  
 $n = 267$

**included**

studies  
included in  
meta-analysis:  
 $n = 22$

49 effect sizes  
from 19  
species
